# Supplementary material for: 6-month follow-up of VIALE-C demonstrates improved and durable efficacy in patients with untreated AML ineligible for intensive chemotherapy
Source: PubMed Central journal article supplement (PMC8486817; doi:10.1038/s41408-021-00555-8), 2021-10-01
Supplement: 41408_2021_555_MOESM1_ESM.pdf [file 41408_2021_555_MOESM1_ESM.pdf]

1 **Supplementary Material**

2 **Supplementary Table S1 Reasons for study drug discontinuation**

| Reasons for discontinuation                                                 | Venetoclax +              | Placebo +                |
|-----------------------------------------------------------------------------|---------------------------|--------------------------|
|                                                                             | LDAC<br>( <i>n</i> = 143) | LDAC<br>( <i>n</i> = 68) |
| <b>Randomized, <i>n</i></b>                                                 | 143                       | 68                       |
| Treated, <i>n</i> (%)                                                       | 142 (99.3)                | 68 (100)                 |
| Discontinued venetoclax/placebo, <i>n</i> (%)                               | 117 (81.8)                | 63 (92.6)                |
| <b>Primary reasons for venetoclax/placebo discontinuation, <i>n</i> (%)</b> |                           |                          |
| AE (related to disease progression)                                         | 5 (3.5)                   | 3 (4.4)                  |
| AE (unrelated to disease progression)                                       | 15 (10.5)                 | 6 (8.8)                  |
| Patient withdrawal                                                          | 8 (5.6)                   | 8 (11.8)                 |
| Physician decision                                                          | 8 (5.6)                   | 8 (11.8)                 |
| Disease progression <sup>a</sup>                                            | 17 (11.9)                 | 12 (17.6)                |
| Morphologic relapse <sup>b</sup>                                            | 23 (16.1)                 | 3 (4.4)                  |
| Treatment failure <sup>c</sup>                                              | 18 (12.6)                 | 13 (19.1)                |
| Death                                                                       | 18 (12.6)                 | 8 (11.8)                 |
| Other                                                                       | 5 (3.5)                   | 2 (2.9)                  |

*AE* adverse event, *CR* complete response, *CRi* CR with incomplete hematologic recovery, *LDAC* low-dose cytarabine.

<sup>a</sup>Disease progression is defined per European LeukemiaNet recommendations: 50% increase in bone marrow or peripheral blasts over baseline or new extramedullary disease. <sup>b</sup>Morphologic relapse is defined as the reappearance of ≥5% blasts after CR/CRi in peripheral blood or bone marrow or the

---

development of extramedullary disease. °Treatment failure is defined as failure to achieve CR, CRi, partial response, or morphologic leukemia-free state, or death from any cause.
